# Supplementary material
Source: Springer Nature journal article supplement (https://www.springermedizin.de/resource/supplementary/12879_2012_1988_MOESM3_ESM.pdf/9443510)

A

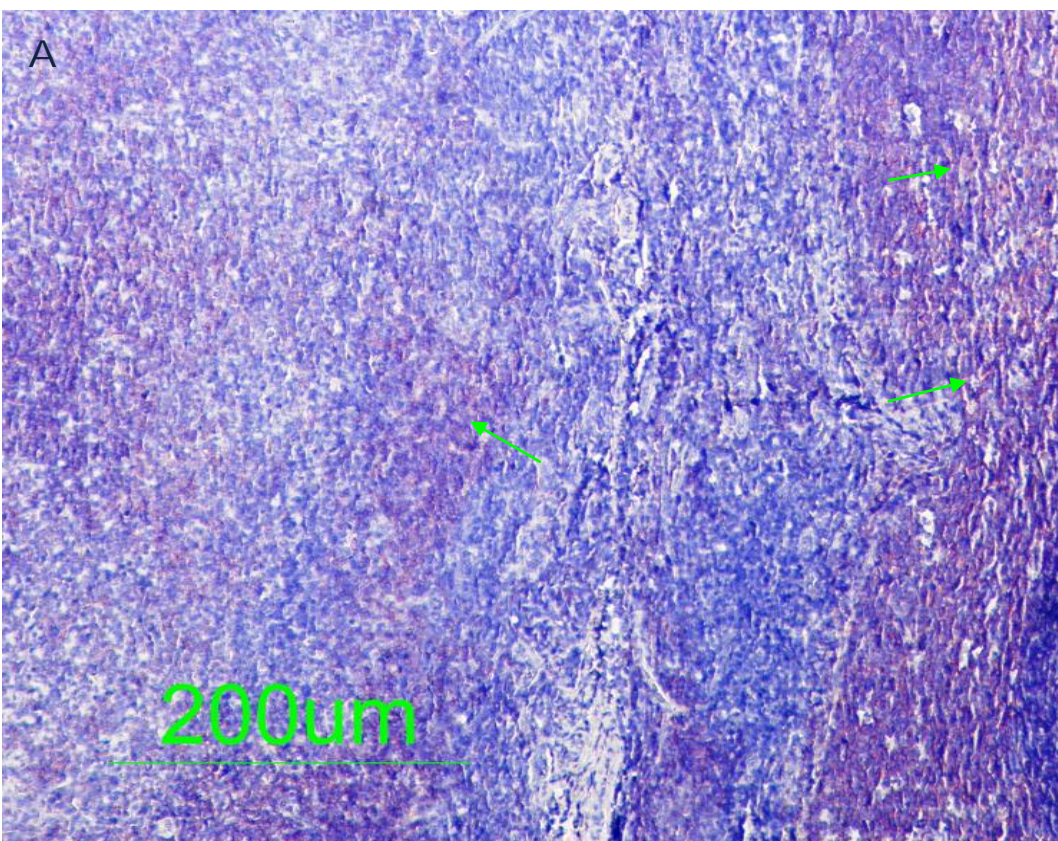

B

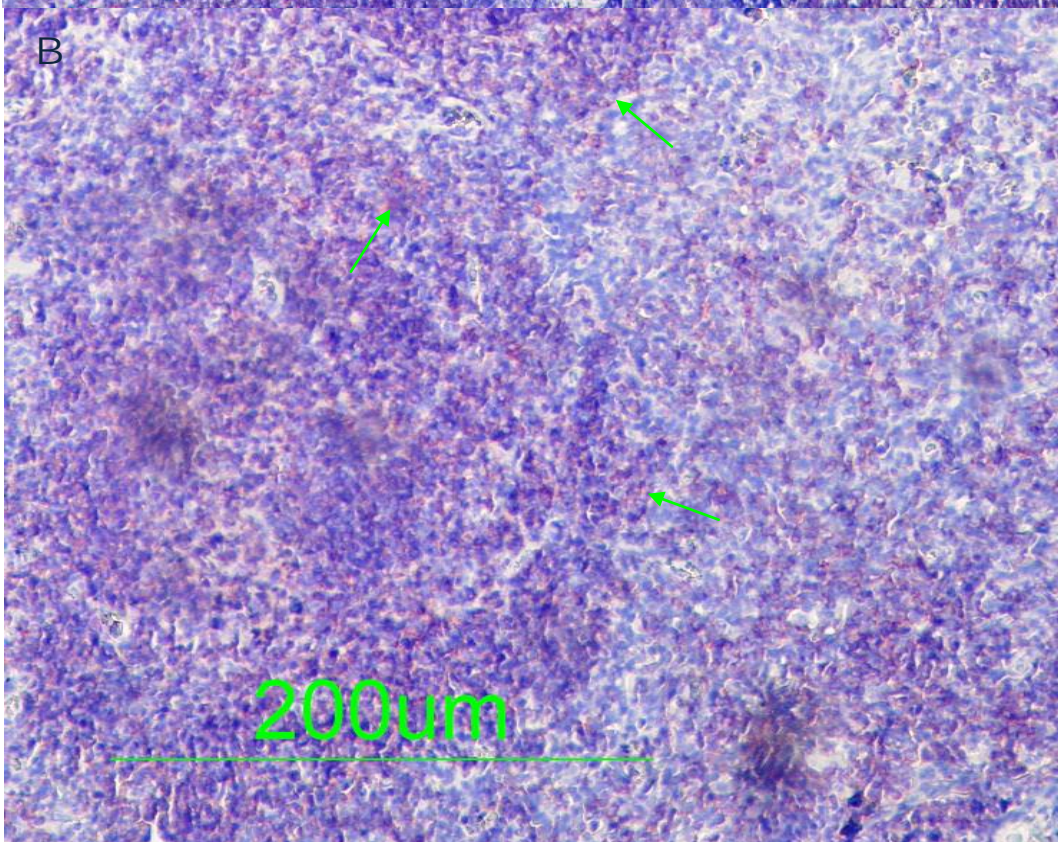

Supplement: MOESM3 [file 9443510]
